# Supplementary material for: Electronic structures and optical properties of arsenene and antimonene under strain and an electric field
Source: Royal Society of Chemistry journal article supplement (doi:10.1039/c7tc04072e), 2017-11-27
Supplement: c7tc04072e1.pdf [file c7tc04072e1.pdf]

## Supporting Information

### Electronic structures and optical properties of arsenene and antimonene under strain and electric field

Huabing Shu,<sup>\*a</sup> Yunhai Li,<sup>b</sup> Xianghong Niu,<sup>b</sup> and JiYuan Guo<sup>a</sup>

<sup>a</sup>College of Science, Jiangsu University of Science and Technology, Zhenjiang

212001, China

<sup>b</sup>School of Physics, Southeast University, Nanjing 211189, China

\*E-mail:shb1122@outlook.com

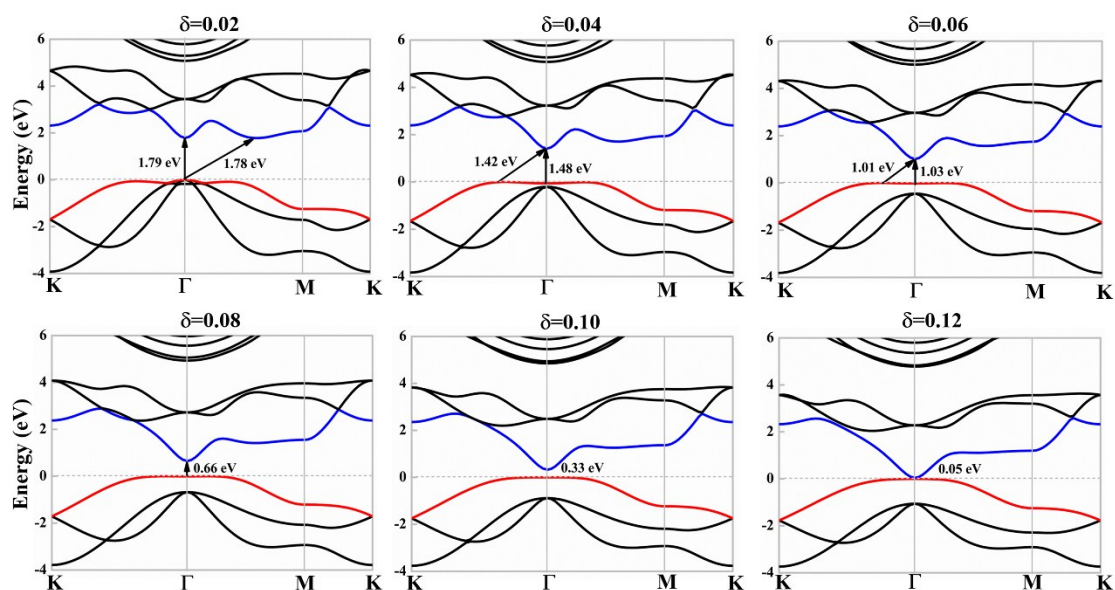

**Figure S1.** The band structures of  $\beta$ -As under the different tensile strain. The blue and red solid lines show two band edges.

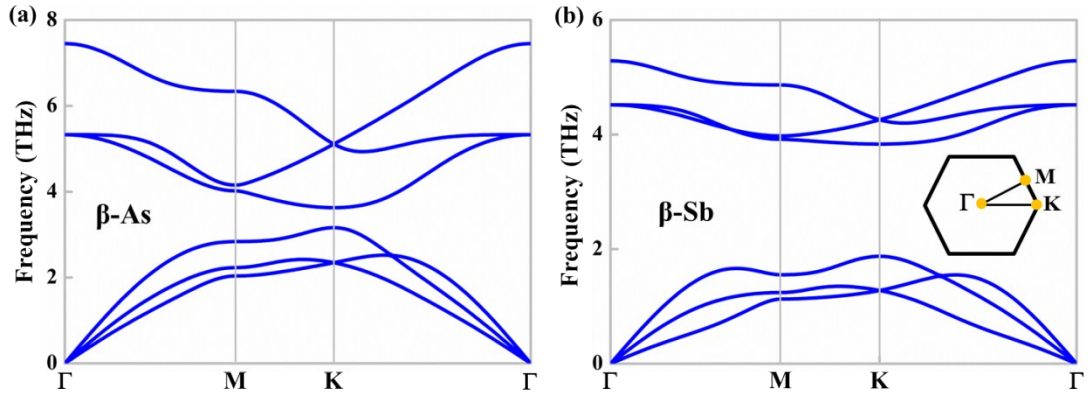

**Figure S2.** Phonon dispersion under biaxial tensile strain of 12%: (a)  $\beta$ -As, (b)  $\beta$ -Sb.

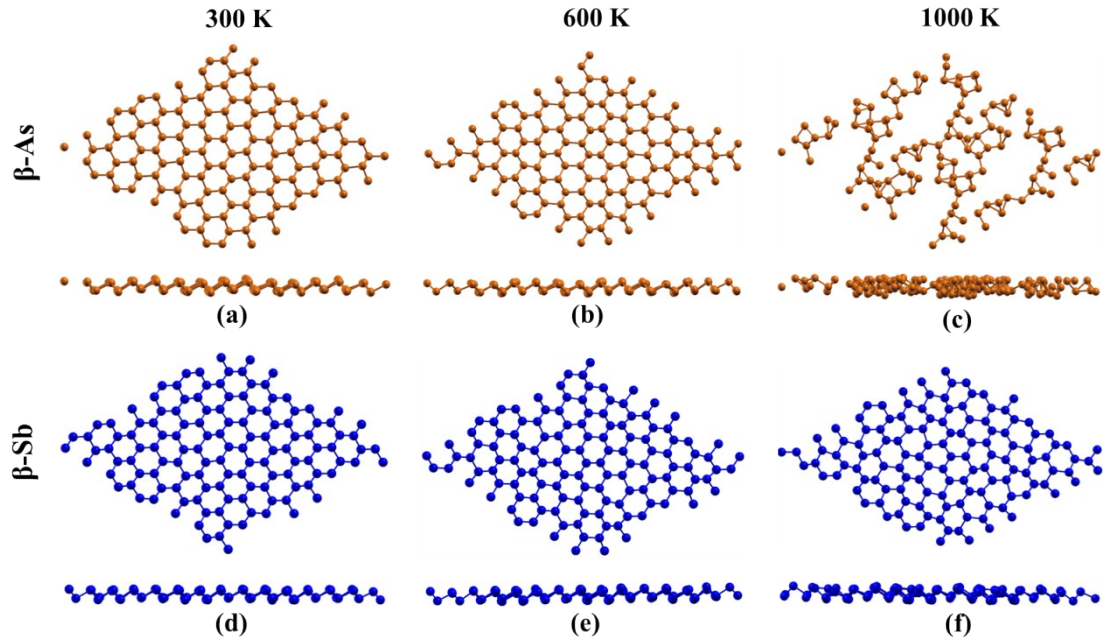

**Figure S3.** Snapshots of atomic structures of  $\beta$ -As (a-c) and  $\beta$ -Sb (d-f) obtained by molecular dynamics calculations at  $T= 300, 600$  and  $1000$  K, respectively.

**Table S1.** Structural parameters and energy bandgaps of the  $\beta$ -As and  $\beta$ -Sb: Lattice  $a$  ( $\text{\AA}$ ), bond length  $l$  ( $\text{\AA}$ ), bond angle  $\theta$  ( $^\circ$ ), and buckling height  $\Delta$  ( $\text{\AA}$ );  $E_{\text{g-PBE}}$  (eV) and  $E_{\text{g-}G_0W_0}$  (eV) at the DFT-PBE and  $G_0W_0$  levels, respectively. The unit of the electric field is  $\text{V/\AA}$ . “i” and “d” show the indirect and direct bandgap, respectively.

| Name        | Field | $a$   | $l$    | $\Delta$ | $\theta$ | $E_{\text{g-PBE}}$ | $E_{\text{g-}G_0W_0}$ |
|-------------|-------|-------|--------|----------|----------|--------------------|-----------------------|
| $\beta$ -As | 0.00  | 3.635 | 2.5216 | 1.4053   | 91.951   | 1.61 (i)           | 2.70 (i)              |
|             | 0.60  | 3.641 | 2.5221 | 1.4064   | 91.925   | 0.82 (d)           | 1.11 (d)              |
|             | 0.70  | 3.644 | 2.5243 | 1.4103   | 91.822   | 0.00               | 0.00                  |
| $\beta$ -Sb | 0.00  | 3.982 | 2.8047 | 1.6110   | 90.295   | 1.10 (i)           | 2.25 (i)              |
|             | 0.60  | 3.986 | 2.8061 | 1.6133   | 90.238   | 0.43 (d)           | 0.53 (d)              |
|             | 0.63  | 3.991 | 2.8062 | 1.6135   | 90.234   | 0.00               | 0.00                  |

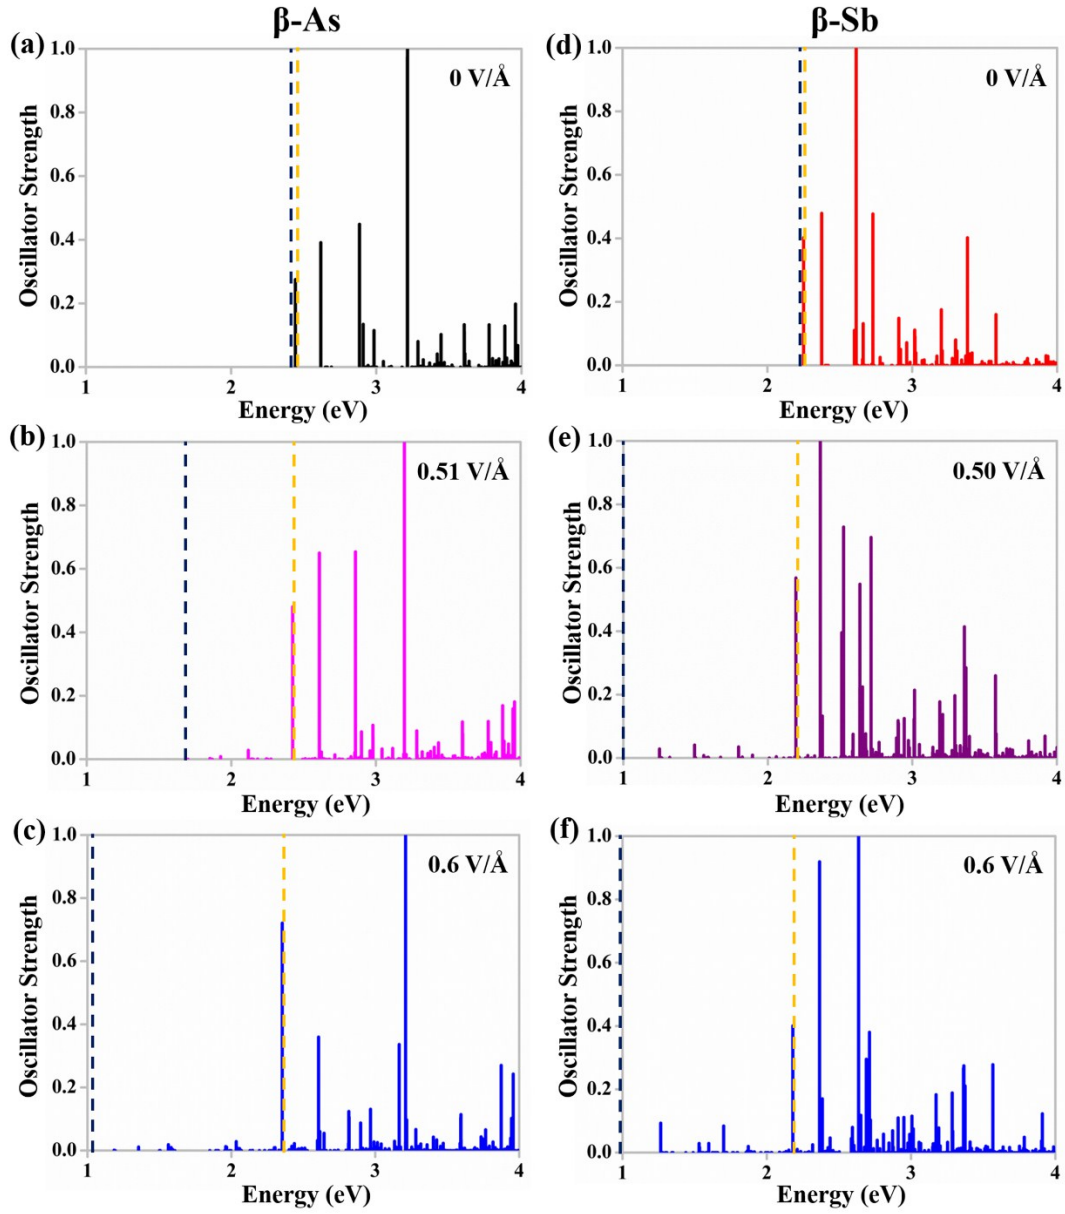

**Figure S4.** Oscillator strengths of the excited states for incident light polarization parallel to the surface (along the lattice vector  $a$  direction) under externally electric field: (a)-(c)  $\beta$ -As and (d)-(f)  $\beta$ -Sb. Two dot lines show the positions of the first dark state (black) and first bright excited state (orange), respectively.
